# Supplementary figures and images for: Comprehensive Evolutionary Analysis of Complete Epstein–Barr Virus Genomes from Argentina and Other Geographies
Source: MDPI journal article supplement (doi:10.3390/v13061172), 2021-06-18

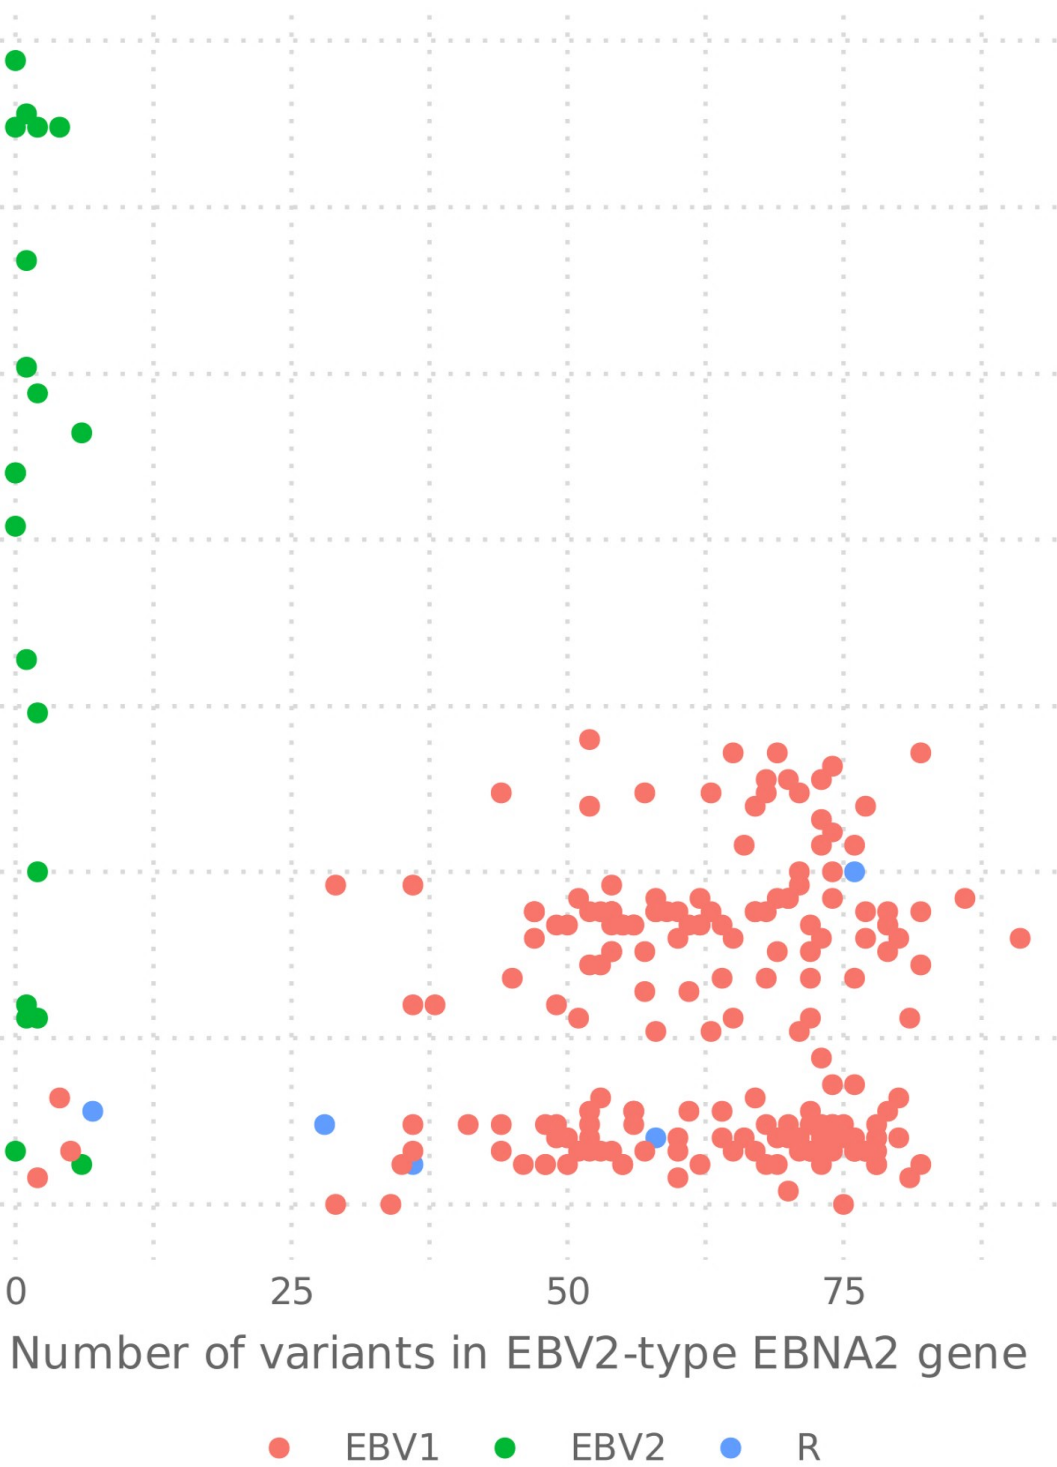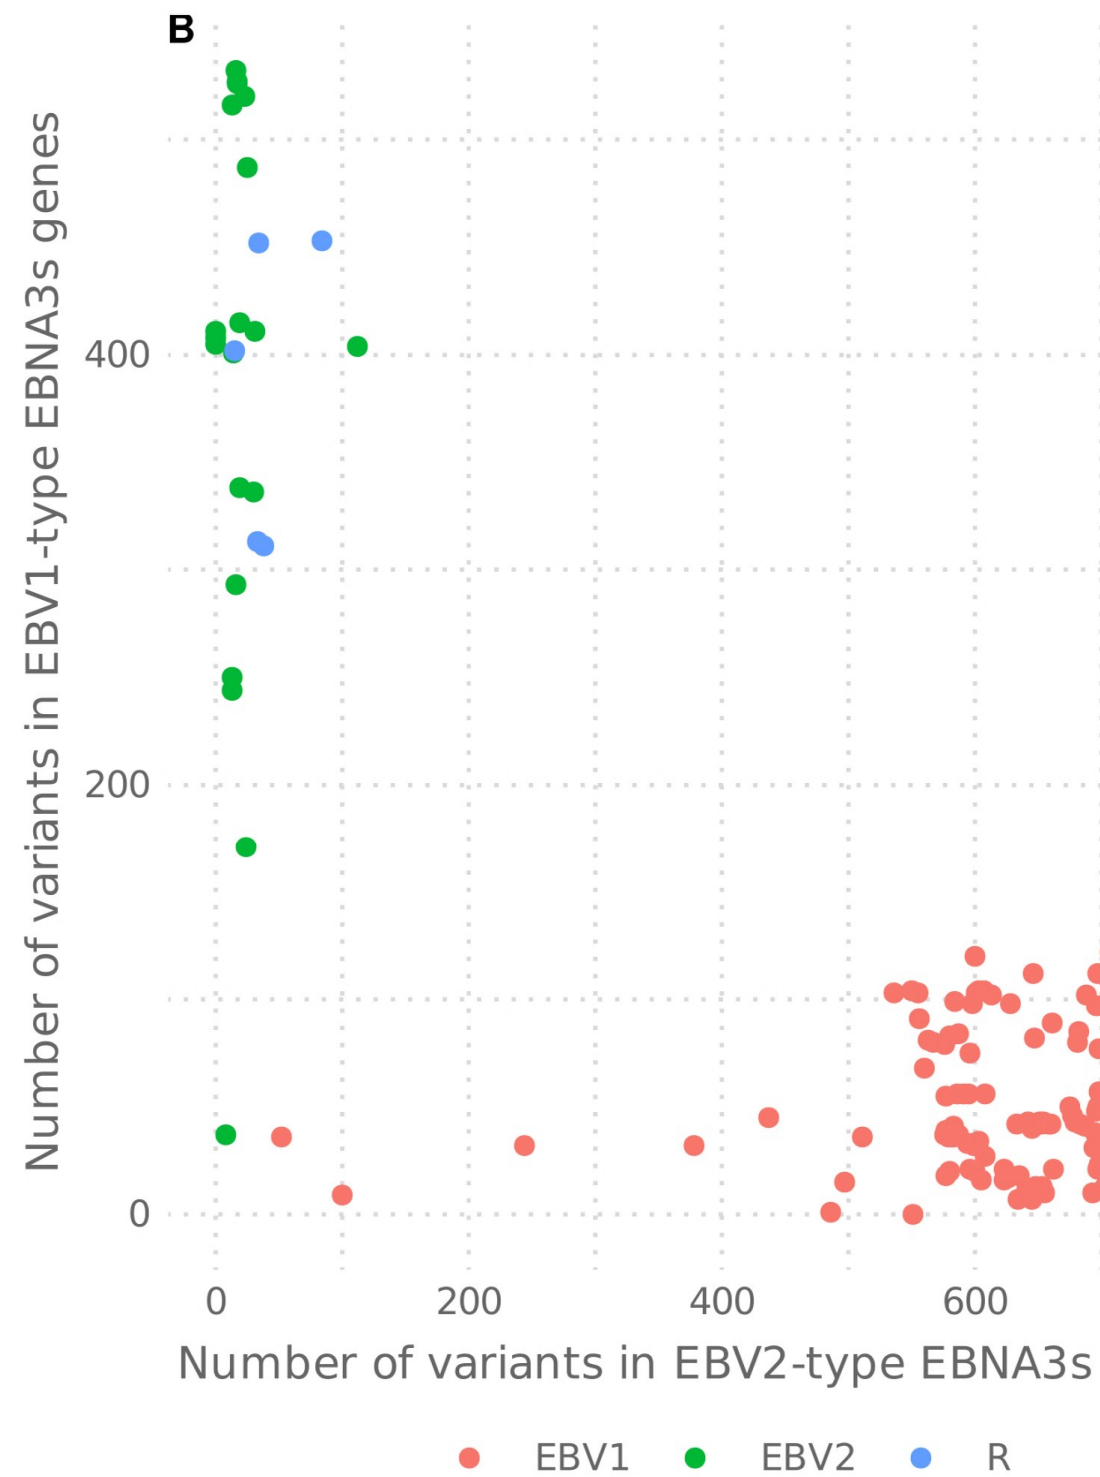

Supplement: s1 [file s1]
